# Supplementary material for: Electrochemical preparation of porous MoO3film with a high rate performance as anode for lithium ion batteries
Source: Royal Society of Chemistry journal article supplement (doi:10.1039/c2ta00361a), 2012-10-16
Supplement: c2ta00361a.pdf [file c2ta00361a.pdf]

### Supplementary Information for:

## Electrochemical preparation of porous MoO<sub>3</sub> film with a high rate performance as anodes for lithium ion batteries

Guangyu Zhao<sup>b</sup>, Naiqing Zhang<sup>a,b</sup> and Kening Sun<sup>a\*</sup>

<sup>a</sup> State Key Laboratory of Urban Water Resource and Environment, Harbin Institute of Technology, Harbin, Heilongjiang 150090, PR China

<sup>b</sup> Academy of Fundamental and Interdisciplinary Sciences, Harbin Institute of Technology, Harbin, Heilongjiang 150080, PR China

Corresponding author: Tel/Fax: +86 451 86412153.

E-mail address: keningsun@yahoo.com.cn (K. Sun).

### Experimental section

#### Preparation of porous MoO<sub>3</sub> film

All chemical reagents were of analytical grade and were obtained commercially. A CHI 660D electrochemical workstation was used for electrodeposition. The acid peroxy-polymolybdate electrolyte was prepared by dissolving 3.0 g Mo powder (2 μm, Aladdin Chemistry) in 100 mL H<sub>2</sub>O<sub>2</sub> at 60 °C following the reactions:

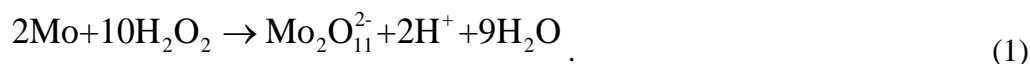

When the metal powder was completely dissolved and the exothermic reaction had ended, a Pt foil was added to reduce the excess peroxide. Then the solution was neutralized to be neutral with ammonia. The MoO<sub>3</sub> film was electrodeposited at room temperature with a

constant reduction current of 1 mA using 154 mm<sup>2</sup> circular Ni foam, a Pt foil and a saturation mercury electrode (SCE) as the working, counter and reference electrodes, respectively. The electrochemical reaction followed Formula 2.<sup>1</sup> The as-deposited samples were heat-treated at 400 °C in Ar atmosphere for 3 h.

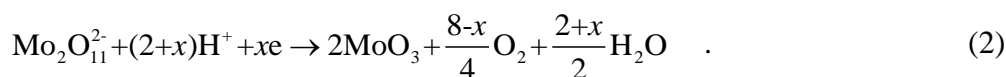

For comparison, MoO<sub>3</sub> powder were prepared using acid inducing deposition method which was realized by adjusting sodium molybdate solution to acid.<sup>2</sup> The as-prepared MoO<sub>3</sub> powder was also heat-treated at 400 °C in Ar atmosphere for 3h.

### **Structural and electrochemical characterization**

A field-emission scanning electron microscope (Hitachi, Su-8100) was used to obtain scanning electron microscope (SEM) images. High resolution transmission electron microscope (HRTEM) images, selected area electron diffraction (SAED) patterns and energy dispersive X-ray spectra (EDS) patterns were obtained on a FEI Tecnai G<sup>2</sup>. X-ray photoelectron spectra (XPS) were obtained with a K-Alpha electron spectrometer from Thermofish Scientific Company using Al K $\alpha$  (1486.6 eV) radiation. The base pressure was about 1 $\times$ 10<sup>-8</sup> mbar. The binding energies were referenced to the C1s line at 284.8 eV from adventitious carbon. X-ray diffraction (XRD) patterns were obtained by Rigaku D/max-2000 X-ray diffractometer with Cu K $\alpha$  radiation ( $\lambda = 1.5418 \text{ \AA}$ ). Particle size analysis of MoO<sub>3</sub> powder prepared using acid inducing deposition method was done with a laser particle size analyzer (OMECA, LS 900). The mass of the electrodes were quantified by a Mettler AE240 balance.

A PAR 2273 electrochemical workstation was used for the cyclic voltammetry (CV) and

electrochemical impedance spectroscopy (EIS) measurements. The battery tests were carried out in the CR2025 button testing batteries consisting of a porous MoO<sub>3</sub> film electrode, microporous membrane (Celgard 2400) and lithium foil as the counter electrode. For comparison, pristine MoO<sub>3</sub> powder electrodes with area of 154 mm<sup>2</sup> coated on Cu foils were used for electrochemical measurements (MoO<sub>3</sub> powder: polyvinylidene fluoride (PVDF): acetylene black=8:1:1, weight ratio). The electrolyte was LiPF<sub>6</sub> (1M) in a 50: 50 (V/ V) mixture of ethylene carbonate (EC) and diethyl carbonate (DMC) provided by Tinci Company (Guangzhou China). A BTS-2000 Neware Battery Testing System was employed for charge/discharge testing in the voltage range of 3.0–0.02 V vs. Li<sup>+</sup>/Li.

[1]. T. M. McEvoy, K. J. Stevenson, J. T. Hupp and X. Dang, *Langmuir*, 2003, **19**, 4316–4326.

[2]. R. Zheng, E. Wang, *Chem. Online*, 1984, **9**, 12–15.

### SI-1. Size distribution curve

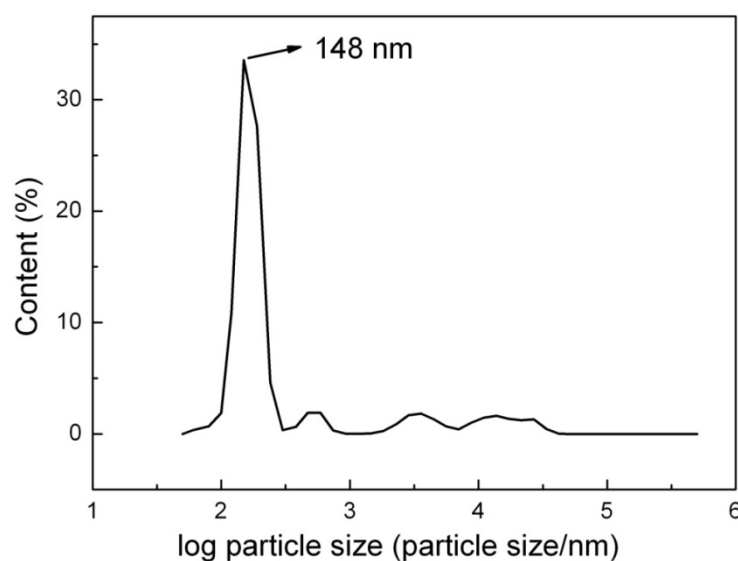

Figure S1 Size distribution curve of pristine MoO<sub>3</sub> powder for comparison.

## SI-2. TEM results

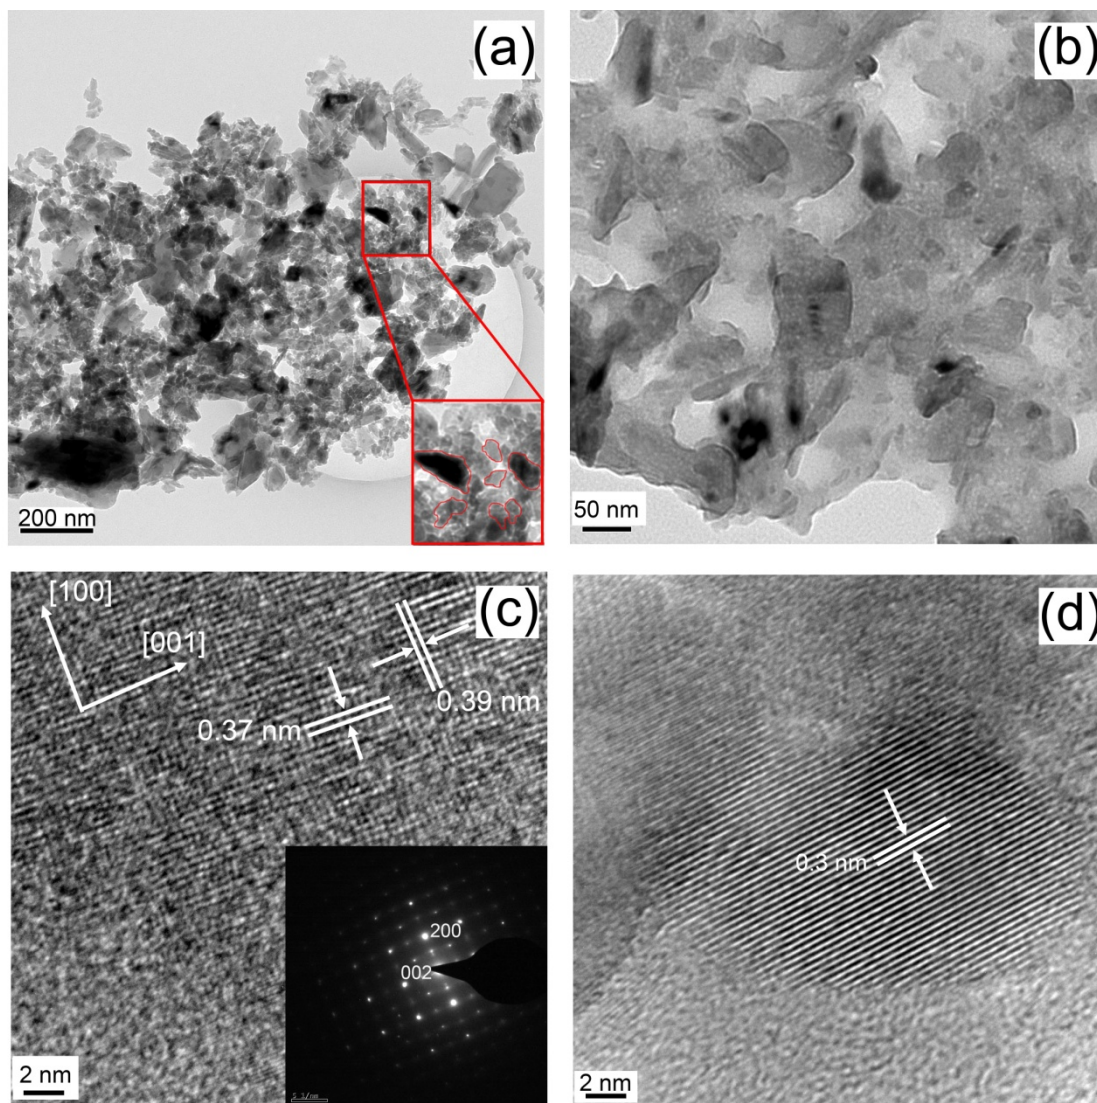

Figure S2 (a, b) TEM images of  $\text{MoO}_3$  grains; (c, d) HRTEM images of the  $\text{MoO}_3$  grains (insert in (c) is the SAED pattern).

### SI-3. XRD patterns

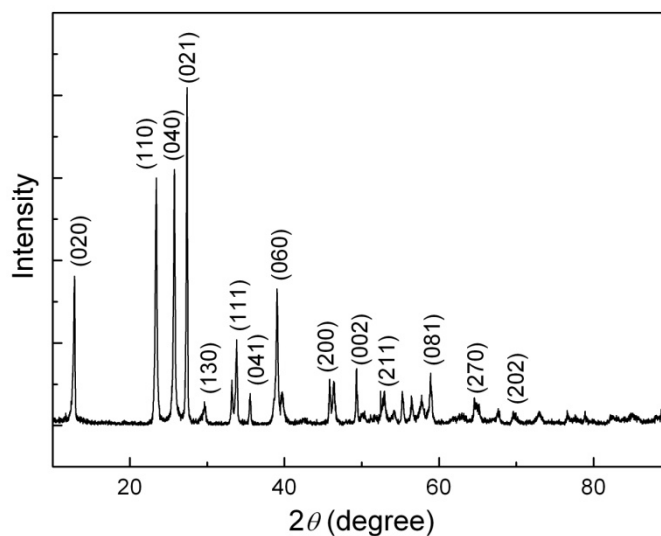

Figure S3 XRD patterns of the  $\text{MoO}_3$  grains scratched from porous film.

### SI-4. EDS patterns

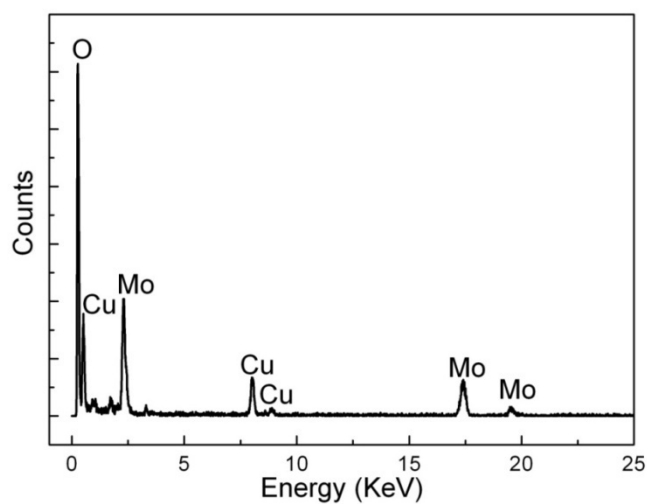

Figure S4 EDS patterns of  $\text{MoO}_3$  grains scratched from porous film.

### SI-5. XPS spectra

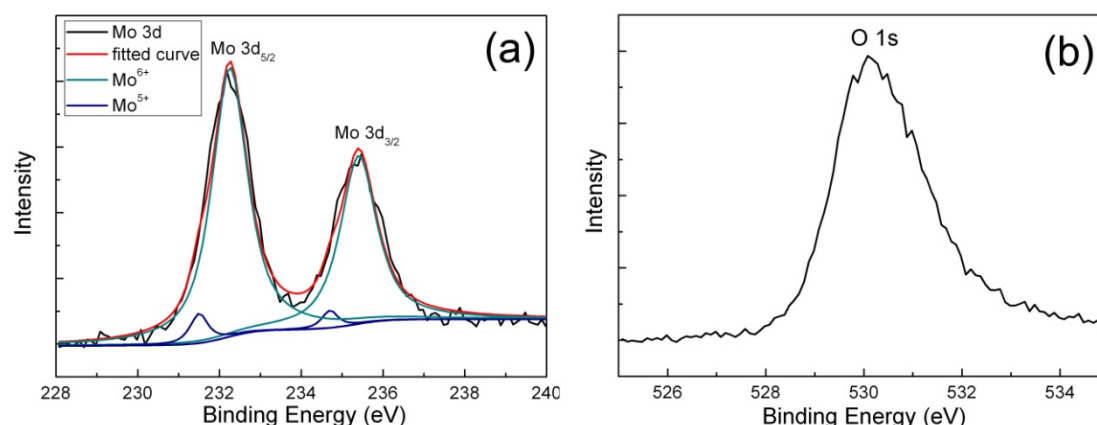

Figure S5 High resolution XPS spectra (Mo and O elements) of porous MoO<sub>3</sub> film.

### SI-6. EIS tests

The diffusion coefficients are calculated according to the following equation<sup>3-5</sup>:

$$\sigma = \left[ \frac{RT}{\sqrt{2}n^2 F^2 AC_{\text{Li}}} \right] \frac{1}{\sqrt{D_{\text{Li}}}}, \quad (3)$$

converted to

$$D_{\text{Li}} = \frac{R^2 T^2}{2n^4 F^4 A^2 \sigma^2 C_{\text{Li}}^2}, \quad (4)$$

where the meanings of  $n$  is the number of electrons per-molecule during oxidization,  $A$  is the surface area of the anode,  $D_{\text{Li}}$  is the diffusion coefficient of lithium ion,  $R$  is the gas constant,  $T$  is the absolute temperature,  $F$  is the Faraday constant,  $C_{\text{Li}}$  is the concentration of lithium ion, and  $\sigma$  is the Warburg factor which has relationship with  $Z_{\text{re}}$ :

$$Z_{\text{re}} = R_{\text{D}} + R_{\text{L}} + \sigma \omega^{-1/2}, \quad (5)$$

where the meanings of  $Z_{\text{re}}$  is the real part of the resistance in the low frequency region,  $\omega$  is corresponding frequency. Fig. S7† shows the relationship between  $Z_{\text{re}}$  and square root of

frequency ( $\omega^{-1/2}$ ) in the low-frequency region.

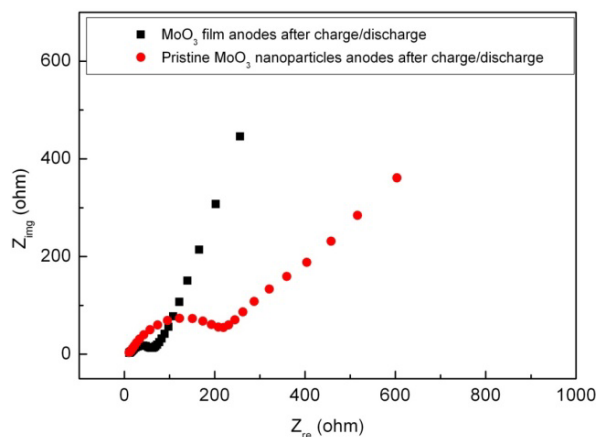

Figure S6 Nyquist plots of porous MoO<sub>3</sub> film anodes and the pristine MoO<sub>3</sub> powder anodes after multi-cycle charge/discharge.

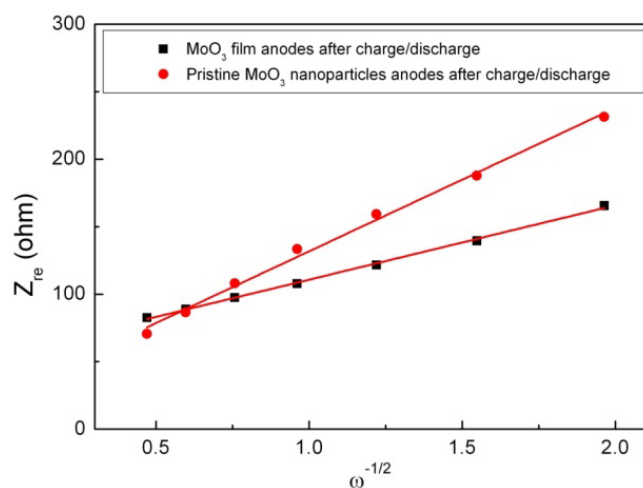

Figure S7 Relationship between real part of the resistance ( $Z_{re}$ ) and square root of frequency ( $\omega^{-1/2}$ ) in the low-frequency region.

[3]. N. Takami, A. Satoh and M. Hara, *J. Electrochem. Soc.*, 1995, **142**, 371–378.

[4]. H. Liu, C. Li, H. P. Zhang, L. J. Fu, Y. P. Wu and H. Q. Wu, *J. Power Sources*, 2006, **159**, 717–720.

[5]. A. J. Bard and L. R. Faulkner, in *Electrochemical Methods*, Wiley, New York, 1980, p. 213.
